# Supplementary material for: Enhancement of Pb(ii) adsorptive removal by incorporation of UiO-66-COOH into the magnetic graphitic carbon nitride nanosheets
Source: Royal Society of Chemistry journal article supplement (doi:10.1039/d4ra00364k), 2024-01-01
Supplement: d4ra00364k1.pdf [file d4ra00364k1.pdf]

## Electronic Supporting information

### Enhancement of Pb(II) adsorptive removal by incorporation of UiO-66-COOH into the magnetic graphitic carbon nitride nanosheets

Sayeh Alvandi,<sup>ab</sup> Mojtaba Hosseinfard,<sup>c\*</sup> Mohsen Bababmoradi,<sup>a</sup>

<sup>a</sup> *Department of Physics, Iran University of Science and Technology, Tehran 16846-13114, Iran. E-mail:*

*[babamoradi@iust.ac.ir](mailto:babamoradi@iust.ac.ir)*

<sup>b</sup> *Department of Nano Technology and Advanced Materials, Materials and Energy Research Center,*

*Karaj, Iran. E-mail: [sayeh.alvandi78@gmail.com](mailto:sayeh.alvandi78@gmail.com)*

<sup>c</sup> *Department of Energy, Materials and Energy Research Center, Karaj, Iran. E-mail:*

*[m.hosseini@merc.ac.ir](mailto:m.hosseini@merc.ac.ir)*

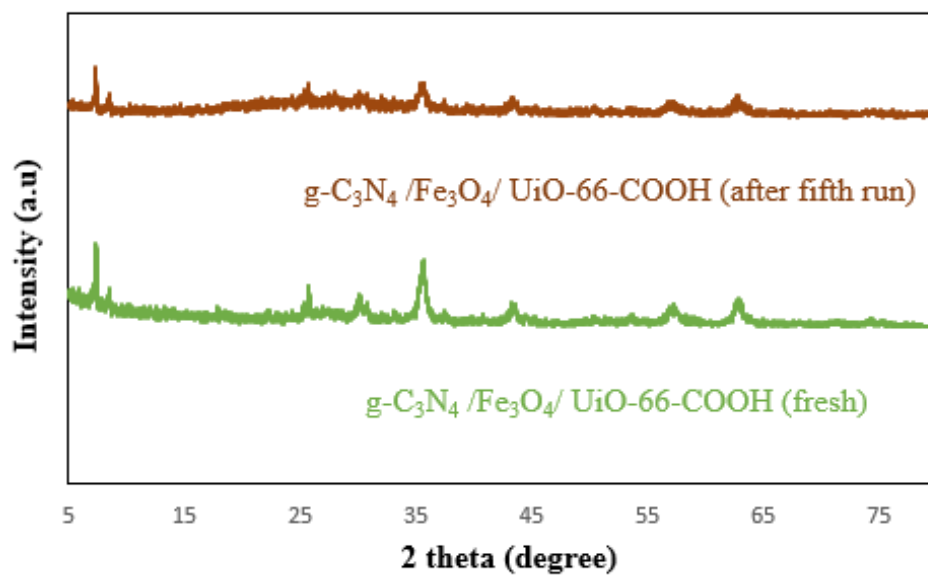

**Fig. S1** XRD patterns of g-C<sub>3</sub>N<sub>4</sub>/Fe<sub>3</sub>O<sub>4</sub>/UiO-66-COOH: fresh and after fifth run.

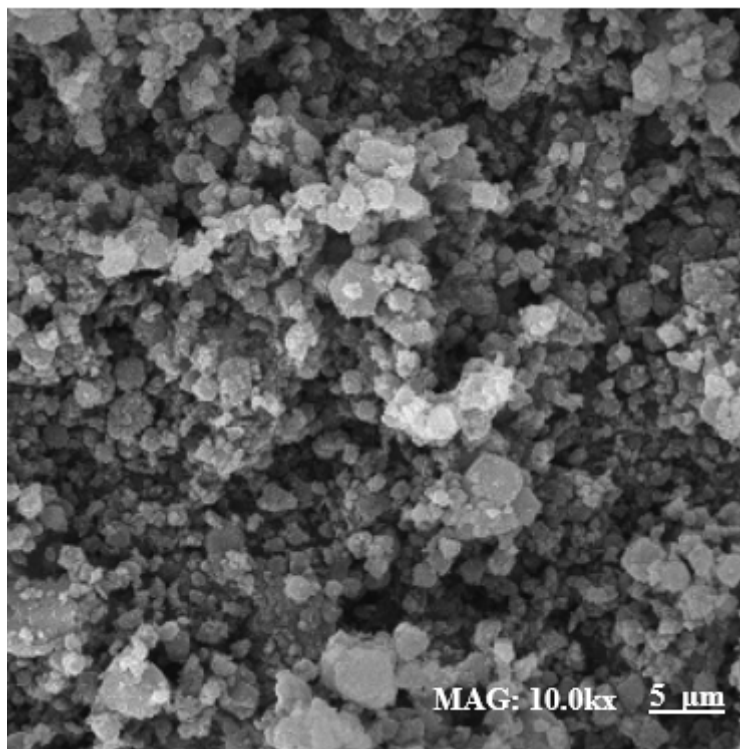

**Fig. S2** SEM image of reused g-C<sub>3</sub>N<sub>4</sub>/Fe<sub>3</sub>O<sub>4</sub>/UiO-66-COOH.
